# Supplementary material for: MicroRNA-340 inhibits the proliferation and promotes the apoptosis of colon cancer cells by modulating REV3L
Source: PubMed Central journal article supplement (PMC5797040; doi:10.18632/oncotarget.23703), 2017-12-26
Supplement: oncotarget-09-5155-s001.pdf [file oncotarget-09-5155-s001.pdf]

# MicroRNA-340 inhibits the proliferation and promotes the apoptosis of colon cancer cells by modulating REV3L

## SUPPLEMENTARY MATERIALS

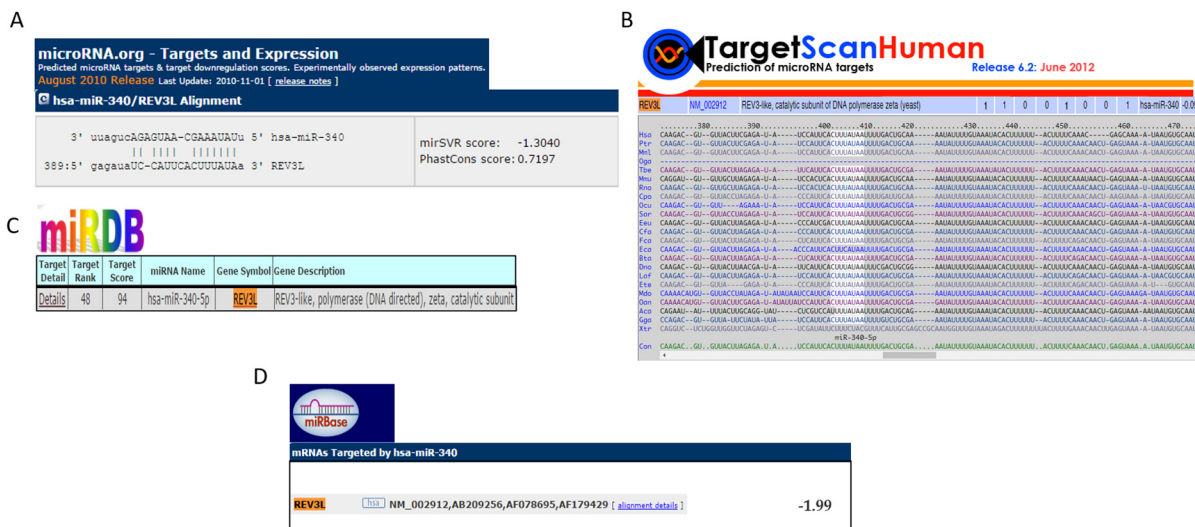

**Supplementary Figure 1: microRNA prediction tools.** The microRNA targeting the 3' UTR of REV3L was predicted using general microRNA prediction tools. (A) microRNA.org. (B) TargetScan. (C) miR Data Base. (D) miRBASE.

Supplementary Table 1: List of antibodies used for immunostaining and western blot

|                        | Host   | Company (Cat No)       | Application |         |
|------------------------|--------|------------------------|-------------|---------|
|                        |        |                        | IHC         | WB      |
| REV3L                  | Goat   | Santa Cruz (sc-5939)   | 1:100       | -       |
| REV1                   | Goat   | Acris (AP31943PU-N)    | 1:100       | -       |
| MAD2L2                 | Rabbit | Biorbyt(Orb100056)     | 1:100       | -       |
| SAPK/JNK               | Rabbit | Cellsignaling (#9252S) | -           | 1:1000  |
| pSAPK/pJNK             | Rabbit | Cellsignaling (#9251S) | -           | 1:1000  |
| ERK 1/2                | Rabbit | Zymed (13-6200)        | -           | 1:1000  |
| pERK 1/2               | Rabbit | Abcam (ab8227)         | -           | 1:1000  |
| p38                    | Rabbit | Cellsignaling (#9212S) | -           | 1:1000  |
| pp38                   | Rabbit | Cellsignaling (#9211S) | -           | 1:1000  |
| GAPDH                  | Mouse  | Millipore (AB2302)     | -           | 1:1000  |
| Fibrillin              | Rabbit | Cell Signaling (#2639) | -           | 1:1000  |
| Peroxidase anti-mouse  | Mouse  | Vector (PI2000)        | -           | 1:10000 |
| Peroxidase anti-rabbit | Rabbit | Vector (PI 1000)       | -           | 1:10000 |
| Alexa Fluor 488        | Goat   | Invitrogen (A11055)    | 1:500       | -       |

**Supplementary Table 2: List of primers used for real-time quantitative polymerase chain reaction and Luciferase reporter assay**

| Gene                      | Forward primer (5' – 3')                                 | Reverse primer (5' – 3')                       |
|---------------------------|----------------------------------------------------------|------------------------------------------------|
| hGAPDH                    | GGAGCGAGATCCCTCCAAAAT                                    | GGCTGTTGTCATACTTCTCATGG                        |
| REV3L                     | TGATGTCTTCAGCTGGTAT                                      | CCGCCCTTCAGGTTCACTT                            |
| hsa-miR-340-5p- Stem loop | GTCGTATCCAGTGCAGGGTCCGAG<br>GTATTCCGACTGGATACGACAATCAG   | -                                              |
| hsa-miR-340-5p            | GCGGTTATAAAGCAATGAGA                                     | -                                              |
| RNU6 Stem loop            | GTCGTATCCAGTGCAGGGTCCGAGGTA<br>TTCGCACTGGATACGACTATGGAAC | -                                              |
| RNU6                      | CTGCGCAAGGATGACACGCA                                     | -                                              |
| Universal reverse primer  | -                                                        | GTGCAGGGTCCGAGGT                               |
| RNF130                    | GCTCACGTTTCGCATCGAC                                      | AACCGGGTTTGTGGATCACAG                          |
| MMP 2                     | ATAACCTGGATGCCGTCGT                                      | AGGCACCCTTGAAGAAGTAGC                          |
| MMP 9                     | GAACCAATCTCACCGACAGG                                     | GCCACCCGAGTGTAACCATA                           |
| 3'UTR- REV3L              | TAGGCGATCGCTCGAGACCATAT<br>CTCCGGCAGTTATTAGA             | TTGCGGCCAGCGGCCGCAAAA<br>CTCAGAAAAGGGTAGGGTAAG |
| 3'UTR Del- REV3L          | TAAGCAGAATTCCAAACGAGCA<br>AAATAATGTGC                    | TAAGCAGAATTCGAAGTAACAC<br>GTCTTGATAC           |
